# Supplementary material for: Fluid therapy and outcome: a prospective observational study in 65 German intensive care units between 2010 and 2011
Source: Springer Nature journal article supplement (doi:10.1186/s13613-018-0364-z), 2018-02-16
Supplement: MOESM1 [file 15472862]

## **Supplemental digital content**

**Supplemental digital content 1:** Case report form.

**Supplemental digital content 2:** Predicted vs. actual mortality, valid entries for SAPS II and APACHE II scores.

**Supplemental digital content 3:** Primary diagnosis of study patients, OPS-codes.

**Supplemental digital content 4:** Baseline characteristics and fluid data for low sample size subcohorts

**Supplemental digital content 5:** Daily fluid balance in study patients.

**Supplemental digital content 6:** Fluid balances and infusion amounts of study patients eligible for multivariable analysis and subcohorts.

**Supplemental digital content 7:** Daily colloid infusion in study patients

**Supplemental digital content 8:** Effects of colloid infusion (HES 130/0.4) in Cox regression analysis of 90-day mortality.

**Supplemental digital content 9:** Missing data analysis in Cox regression analysis of 90-day mortality for crystalloids vs. colloids

**Supplemental digital content 10:** Effects of colloid infusion in logistic regression analysis of intensive care unit mortality.

**Supplemental digital content 11:** Effects of colloid infusion (HES 130/0.4) in logistic regression analysis of intensive care unit mortality.

**Supplemental digital content 12:** Effects of colloid infusion (HES 130/0.4) in logistic regression analysis of RIFLE "failure".

**Supplemental digital content 13:** Urine output and creatinine concentrations

**Supplemental digital content 14:** Acute kidney injury in study patients with or without pre-existing chronic kidney disease

**Supplemental digital content 15:** Effects of colloid infusion in logistic regression analysis of renal replacement therapy.





# Follow-Up-Bogen - Register RaFTinG

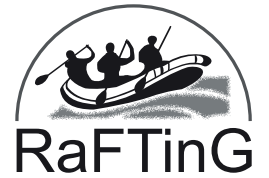

Patienten-Nr.:

Klinik-Nr.:

Datum:

Geburtsdatum:

Geschlecht:  M  W

Aufnahme auf Intensivstation:

Adresse

**Bitte füllen Sie die unten stehenden Felder für die ersten drei Monate nach Ihrem Aufenthalt auf der Intensivstation aus**

Ja  Nein Aus Krankenhaus entlassen

Entlassungsdatum:

Ja  Nein Patient ist verstorben Sterbedatum:  Todesursache:

## Anschlussbehandlung:

Reha-Behandlung:  ambulante Reha  stationär in Reha-Klinik  durch Hausarzt

Ort der Reha-Behandlung:

z.B. Praxis Dr. Mustermann, Klinik XY

Ja  Nein Erneuter Klinikaufenthalt

Grund für Klinikaufenthalt:

Klinik:  Abteilung:

Neue Erkrankung **nach** Klinikaufenthalt:

Ja  Nein Nierenersatzverfahren (Dialyse) Dauer (Tage):

Ja  Nein Besuch eines Dermatologen (Hautarzt) Grund:

## Befindlichkeit:

Pflegestufe **vor** Aufenthalt auf Intensivstation:

Pflegestufe 1  Pflegestufe 2  Pflegestufe 3

Nicht pflegebedürftig

Pflegestufe **nach** Aufenthalt auf Intensivstation:

Pflegestufe 1  Pflegestufe 2  Pflegestufe 3

Nicht pflegebedürftig

Fahren Sie selbst Auto?

Ja  Nein  Kein Führerschein

Berufstätigkeit:

Berufstätig  Nicht berufstätig  Eingeschränkt berufstätig

Vor Erkrankung bereits nicht berufstätig

Datum

Unterschrift

**Bitte senden Sie den ausgefüllten Bogen mit beiliegendem Freiumschlag an die Klinik zurück. Herzlichen Dank!**

**Supplemental digital content 2: Predicted vs. actual mortality, valid entries for SAPS II and APACHE II scores.**

Supplemental digital content 2A: Predicted vs. actual ICU mortality

|                                        | Mortality in ICU |      |      |      |      |       |
|----------------------------------------|------------------|------|------|------|------|-------|
|                                        | alive            |      | dead |      | all  |       |
|                                        | N                | %    | N    | %    | N    | %     |
| <b>Risk for mortality at admission</b> |                  |      |      |      |      |       |
| <b>missing</b>                         | 508              | 94.8 | 28   | 5.2  | 536  | 100.0 |
| <b>0 - 9%</b>                          | 433              | 97.5 | 11   | 2.5  | 444  | 100.0 |
| <b>10-19%</b>                          | 598              | 94.6 | 34   | 5.4  | 632  | 100.0 |
| <b>20-29%</b>                          | 585              | 93.5 | 41   | 6.5  | 626  | 100.0 |
| <b>30-39%</b>                          | 545              | 93.2 | 40   | 6.8  | 585  | 100.0 |
| <b>40-49%</b>                          | 513              | 91.3 | 49   | 8.7  | 562  | 100.0 |
| <b>50-59%</b>                          | 257              | 87.7 | 36   | 12.3 | 293  | 100.0 |
| <b>60-69%</b>                          | 276              | 85.4 | 47   | 14.6 | 323  | 100.0 |
| <b>70-99%</b>                          | 195              | 84.8 | 35   | 15.2 | 230  | 100.0 |
| <b>80-89%</b>                          | 150              | 81.5 | 34   | 18.5 | 184  | 100.0 |
| <b>90-99%</b>                          | 80               | 61.5 | 50   | 38.5 | 130  | 100.0 |
| <b>All</b>                             | 4140             | 91.1 | 405  | 8.9  | 4545 | 100.0 |

Supplemental digital content 2B: Predicted vs. actual 90 day mortality

|                                        | 90 day mortality |      |      |      |      |       |
|----------------------------------------|------------------|------|------|------|------|-------|
|                                        | alive            |      | dead |      | all  |       |
|                                        | N                | %    | N    | %    | N    | %     |
| <b>Risk for mortality at admission</b> |                  |      |      |      |      |       |
| <b>missing</b>                         | 474              | 88.4 | 62   | 11.6 | 536  | 100.0 |
| <b>0 - 9%</b>                          | 416              | 93.7 | 28   | 6.3  | 444  | 100.0 |
| <b>10-19%</b>                          | 553              | 87.5 | 79   | 12.5 | 632  | 100.0 |
| <b>20-29%</b>                          | 545              | 87.1 | 81   | 12.9 | 626  | 100.0 |
| <b>30-39%</b>                          | 511              | 87.4 | 74   | 12.6 | 585  | 100.0 |
| <b>40-49%</b>                          | 474              | 84.3 | 88   | 15.7 | 562  | 100.0 |
| <b>50-59%</b>                          | 242              | 82.6 | 51   | 17.4 | 293  | 100.0 |
| <b>60-69%</b>                          | 244              | 75.5 | 79   | 24.5 | 323  | 100.0 |
| <b>70-99%</b>                          | 173              | 75.2 | 57   | 24.8 | 230  | 100.0 |
| <b>80-89%</b>                          | 133              | 72.3 | 51   | 27.7 | 184  | 100.0 |
| <b>90-99%</b>                          | 73               | 56.2 | 57   | 43.8 | 130  | 100.0 |
| <b>All</b>                             | 3838             | 84.4 | 707  | 15.6 | 4545 | 100.0 |

Supplemental digital content 2C: Number of valid entries for SAPS II and APACHE II

|         |           | 90 day mortality |      |      |      |      |       |
|---------|-----------|------------------|------|------|------|------|-------|
|         |           | alive            |      | dead |      | all  |       |
|         |           | N                | %    | N    | %    | N    | %     |
| SAPS II | APACHE II |                  |      |      |      |      |       |
| missing | missing   | 474              | 88.4 | 62   | 11.6 | 536  | 100.0 |
|         | valid     | 476              | 89.8 | 54   | 10.2 | 530  | 100.0 |
| valid   | missing   | 110              | 80.9 | 26   | 19.1 | 136  | 100.0 |
|         | valid     | 2778             | 83.1 | 565  | 16.9 | 3343 | 100.0 |
| All     |           | 3838             | 84.4 | 707  | 15.6 | 4545 | 100.0 |

**Supplemental digital content 3: Primary diagnosis of study patients.**

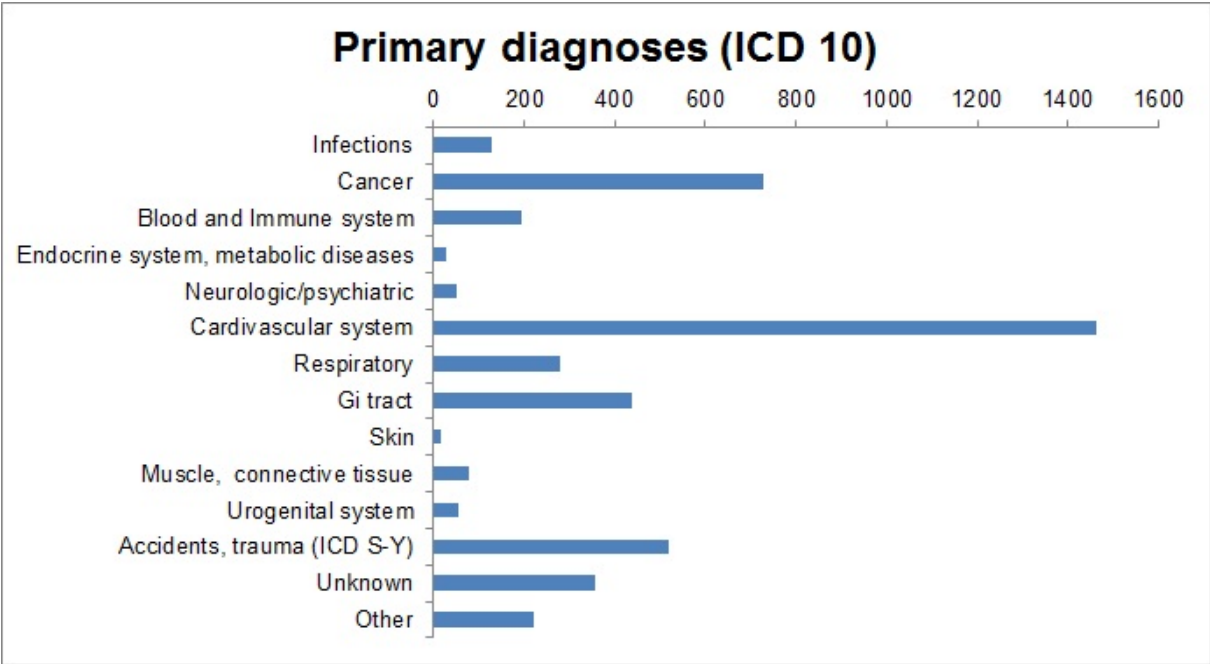

**OPS-Codes for surgical patients.**

405 emergency surgeries

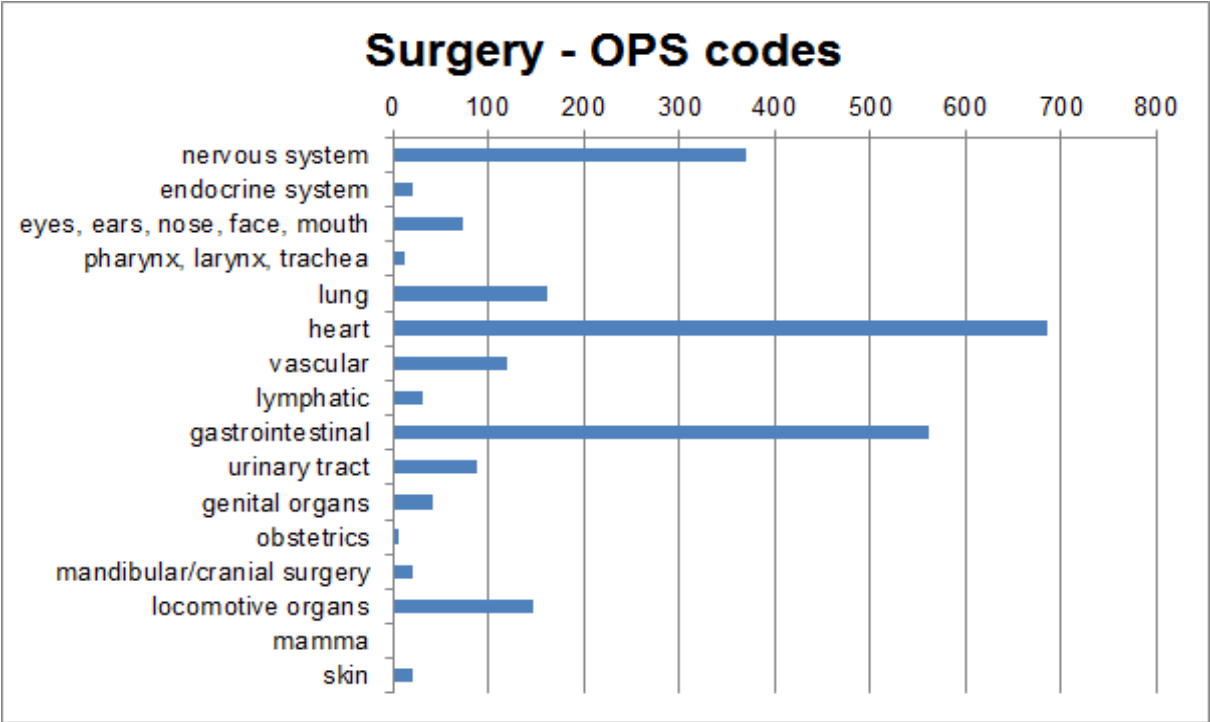



## Supplemental digital content 4: Baseline characteristics and fluid data for low sample size subcohorts

Supplemental digital content 4-A: Baseline characteristics for low sample size subcohorts

|                                                | <b>HES<br/>200/0.5</b> | <b>HES<br/>130/0.42</b> | <b>Gelatin</b> |
|------------------------------------------------|------------------------|-------------------------|----------------|
| N (n[%])                                       | 167 [3.7]              | 207 [4.6]               | 218 [4.8]      |
| Age (y)                                        | 68 [56; 75]            | 69 [56;<br>77]          | 70 [58;<br>75] |
| Gender, male (n[%])                            | 105 [62.9]             | 109<br>[52.7]           | 138<br>[63.3]  |
| Admission type: surgical [%]                   | 101 [60.5]             | 141<br>[68.1]           | 91 [41.7]      |
| Severe sepsis on admission (n[%])              | 34 [20.4]              | 19 [9.2]                | 27 [12.4]      |
| History of CKD (n[%])                          | 43 [25.7]              | 42 [20.3]               | 62 [28.4]      |
| APACHE II                                      | 21 [15; 25]            | 19 [12;<br>24]          | 19 [13;<br>24] |
| SAPS II                                        | 12 [6; 20]             | 26 [9; 38]              | 13 [6; 25]     |
| Mean probability of mortality [%] <sup>a</sup> | 37.8                   | 35.7                    | 35.3           |
| AKI (RIFLE "failure") (n[%])                   | 36 [21.6]              | 24 [11.6]               | 50 [22.9]      |
| Renal replacement therapy in ICU (n[%])        | 21 [12.6]              | 12 [5.8]                | 37 [17.0]      |
| ICU mortality (n[%])                           | 33 [20.0]              | 32 [15.8]               | 24 [11.2]      |
| Length of ICU stay (d)                         | 5 [3; 11]              | 9 [3; 14]               | 3 [1; 9]       |
| 90-day mortality (n[%])                        | 44 [31.9]              | 45 [29.0]               | 47 [33.6]      |

Supplemental digital content 4-B: Fluid data for low sample size subcohorts

|                                                       | <b>HES 200/0.5</b>          | <b>HES 130/0.42</b>        | <b>Gelatin</b>             |
|-------------------------------------------------------|-----------------------------|----------------------------|----------------------------|
| Cumulative fluid balance [mL per study day]           | 630 [237; 1212]<br>N=167    | 503 [-60; 1236]<br>N=207   | 990 [360; 1726]<br>N=218   |
| Fluid balance on day 1 [mL]                           | 1580 [553; 2975]<br>N=167   | 1690 [755; 2772]<br>N=200  | 1691 [1080; 2830]<br>N=218 |
| Cumulative crystalloid amount [mL per study day]      | 2175 [1504; 2942]<br>N=167  | 1735 [1275; 2649]<br>N=207 | 1827 [1312; 2630]<br>N=217 |
| Crystalloid amount on day 1 [mL]                      | 3100 [2175; 4163]<br>N=165  | 3000 [2176; 4067]<br>N=200 | 2560 [1968; 3470]<br>N=215 |
| Cumulative colloid amount [mL per study day]          | 200 [94;375]<br>N=167       | 179 [92; 500]<br>N=207     | 500 [200; 783]<br>N=218    |
| Colloid amount on day 1 [mL]                          | 500 [500; 500]<br>N=120     | 500 [500; 1000]<br>N=135   | 1000 [500; 1500]<br>N=192  |
| Cumulative PRBC transfusion [units per study day]     | 0.3 [0.2; 0.6]<br>N=76      | 0.3 [0.1; 0.7]<br>N=92     | 0.5 [0.3; 1.0]<br>N=101    |
| PRBC transfusion on day 1 [units]                     | 1.0 [0.8; 2.0]<br>N=30      | 2.0 [1.9; 2.9]<br>N=36     | 1.9 [1.5; 2.0]<br>N=64     |
| Cumulative non-PRBC transfusion [units per study day] | 0.2 [0.1; 0.3]<br>N=10      | 0.1 [0.1; 0.3]<br>N=4      | 0.4 [0.2; 0.5]<br>N=17     |
| Non-PRBC transfusion on day 1 [units]                 | 1.3 [0.5; 1.3]<br>N=5       | 2.5 [2.5; 2.5]<br>N=1      | 2.7 [1.5; 3.5]<br>N=8      |
| Cumulative urinary output [mL per study day]          | 2785 [2112; 3413]<br>N=167  | 2653 [1972; 3345]<br>N=207 | 2175 [1417; 2866]<br>N=218 |
| Urinary output on day 1 [mL]                          | 2340 [1600; 33000]<br>N=165 | 2315 [1500; 3200]<br>N=200 | 1643 [1077; 2443]<br>N=216 |

Data are given as median [25th; 75th percentiles]. N, number of patients. PRBC, packed red blood cells. Non-PRBC transfusion comprises fresh frozen plasma, lyophilised plasma, single donor platelet concentrates and multiple donor (pooled) platelet concentrates.

**Supplemental digital content 5:** Daily fluid balance in study patients. The figure depicts the daily fluid balance of the study patients up to 20 days of ICU stay (blue line). Dashed lines represent 25th and 75th percentiles. A All patients, B patients receiving solely crystalloids, C patients receiving crystalloids and colloids.

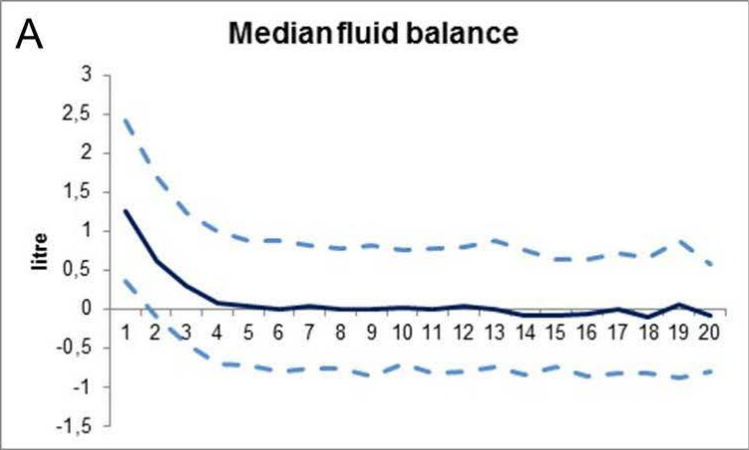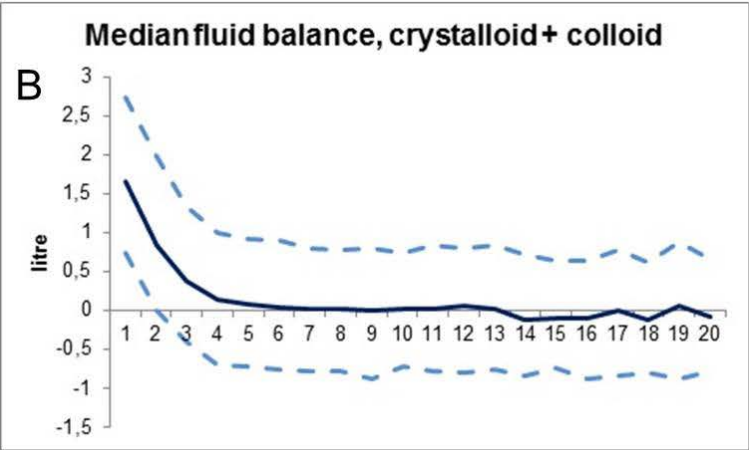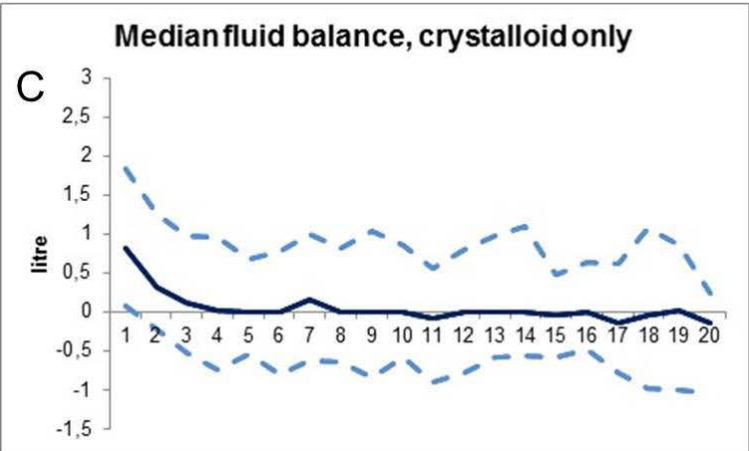

**Supplemental digital content 6: Fluid balances and infusion amounts of study patients eligible for multivariable analysis and subcohorts.**

|                                                       | All                         | Crystalloids only          | All colloids                | p-Value <sup>a</sup> | HES 130/0.4                 | p-Value <sup>b</sup> |
|-------------------------------------------------------|-----------------------------|----------------------------|-----------------------------|----------------------|-----------------------------|----------------------|
| Cumulative fluid balance [mL per study day]           | 436 [0; 1042]<br>N= 3902    | 337 [0; 945]<br>N=1888     | 505 [42; 1149]<br>N=2014    | <0.001               | 462 [22; 1039]<br>N=1277    | <0.001               |
| Fluid balance on day 1 [mL]                           | 1290 [379; 2430]<br>N=3768  | 762 [4;1750]<br>N=1888     | 1645 [705; 2738]<br>N=2014  | <0.001               | 1607 [700; 2622]<br>N=1277  | <0.001               |
| Cumulative crystalloid amount [mL per study day]      | 1334 [767; 2100]<br>N=3902  | 1114 [526; 1844]<br>N=1888 | 1518 [964; 2306]<br>N=2014  | <0.001               | 1395 [883; 2227]<br>N=1277  | <0.001               |
| Crystalloid amount on day 1 [mL]                      | 2228 [1235; 3260]<br>N=3902 | 1753 [772; 2879]<br>N=1888 | 2609 [1790; 3600]<br>N=2014 | <0.001               | 2442 [1653; 3350]<br>N=1277 | <0.001               |
| Cumulative colloid amount [mL per study day]          | 250 [125; 444]<br>N=2014    | -                          | 250 [125; 444]<br>N=2014    | -                    | 250 [125; 400]<br>N=1277    | -                    |
| Colloid amount on day 1 [mL]                          | 500 [500; 1000]<br>N=1555   | -                          | 500 [500; 1000]<br>N=1555   | -                    | 500 [500; 1000]<br>N=1013   | -                    |
| Cumulative PRBC transfusion [units per study day]     | 0.3 [0.2; 0.6]<br>N=1193    | 0.4 [0.2; 0.7]<br>N=248    | 0.3 [0.2; 0.6]<br>N=945     | 0.003                | 0.3 [0.2; 0.6]<br>N=580     | 0.012                |
| PRBC transfusion on day 1 [units]                     | 2.0 [1.0; 2.2]<br>N=562     | 1.9 [1.0; 2.0]<br>N=124    | 2.0 [1.1; 2.2]<br>N=438     | 0.004                | 2.0 [1.1; 2.3]<br>N=280     | 0.001                |
| Cumulative non-PRBC transfusion [units per study day] | 0.2 [0.1;0.4]<br>N= 167     | 0.3 [0.1; 0.5]<br>N=22     | 0.2 [0.1; 0.4]<br>N=145     | 0.067                | 0.2 [0.1; 0.4]<br>N=97      | 0.049                |
| Non-PRBC transfusion on day 1 [units]                 | 1.5 [1.0; 2.3]<br>N=87      | 1.3 [1.0; 2.2]<br>N=14     | 1.5 [1.0; 2.3]<br>N=73      | 0.948                | 1.4 [1.0; 2.0]<br>N=52      | 0.928                |
| Cumulative urinary output [mL per study day]          | 1731 [948; 2618]<br>N=3902  | 1400 [620; 2338]<br>N=1888 | 2006 [1270; 2848]<br>N=2014 | <0.001               | 1744 [1089; 2509]<br>N=1277 | <0.001               |
| Urinary output on day 1 [mL]                          | 1680 [1080; 2440]<br>N=3719 | 1550 [950; 2330]<br>N=1730 | 1770 [1195; 2560]<br>N=1989 | <0.001               | 1645 [1159; 2309]<br>N=1270 | 0.001                |

Data are given as median [25th; 75th percentiles]. N, number of patients. PRBC, packed red blood cells. Non-PRBC transfusion comprises fresh frozen plasma, lyophilised plasma, single donor platelet concentrates and multiple donor (pooled) platelet concentrates. <sup>a</sup> Wilcoxon-Mann-Whitney test for crystalloids vs. colloids, <sup>b</sup> Wilcoxon-Mann-Whitney test for crystalloids vs. HES 130/0.4

### Supplemental digital content 7: Daily colloid infusion in study patients

The figure depicts the mean daily colloid dose of study patients up to 20 days of intensive care unit (ICU) stay (blue line) and the number of patients receiving colloids on successive ICU days (red line). Dashed lines represent the 25th and 75th percentiles and were constant. Notably, the median infusion amount equals the 25th percentile (500 ml) for each study day.

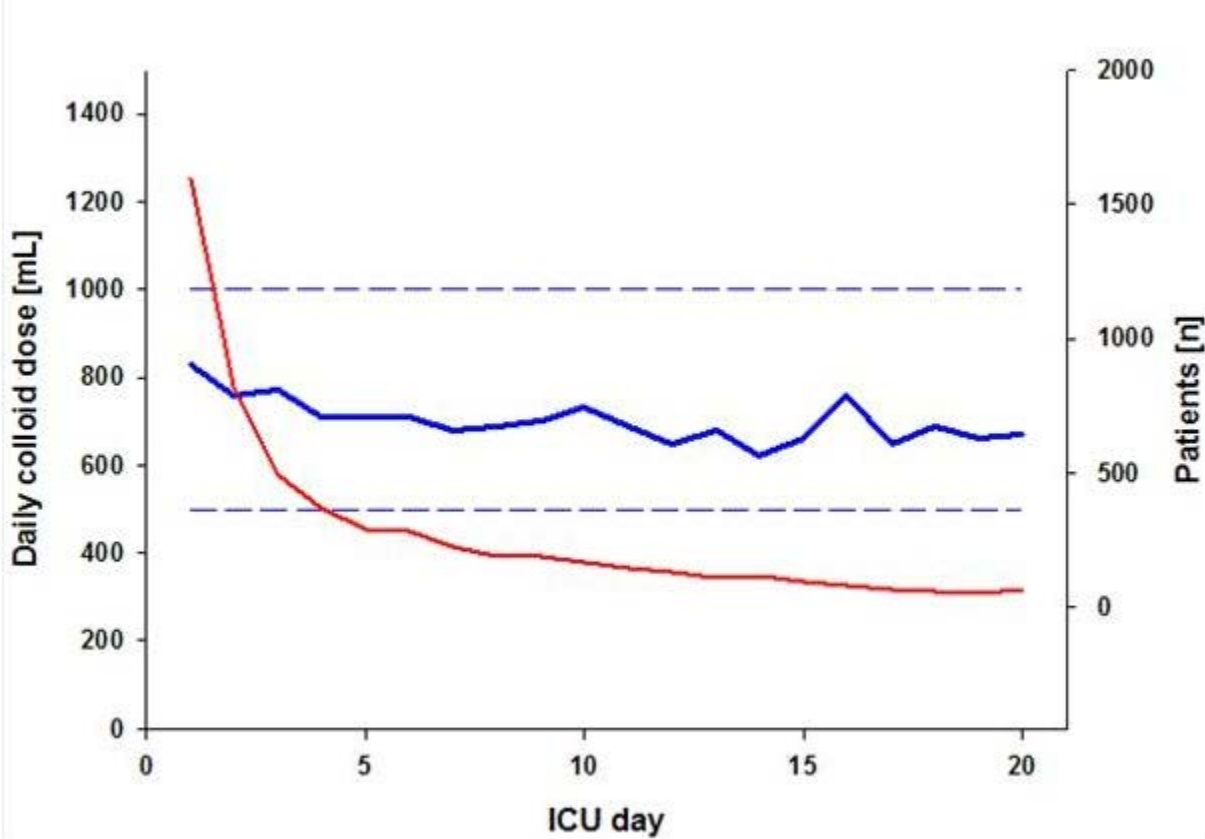

**Supplemental digital content 8: Effects of colloid infusion (HES 130/0.4) in Cox regression analysis of 90-day mortality.**

| Odds / Hazard ratio estimates                  | Unadjusted<br>(only patients eligible for<br>multivariable analysis)* |              |              | Baseline adjustment |              |              | Full model   |              |              |
|------------------------------------------------|-----------------------------------------------------------------------|--------------|--------------|---------------------|--------------|--------------|--------------|--------------|--------------|
|                                                | OR                                                                    | 95% CI       |              | HR                  | 95% CI       |              | HR           | 95% CI       |              |
| <b>Colloid infusion</b>                        | <b>1.568</b>                                                          | <b>1.270</b> | <b>1.936</b> | <b>1.177</b>        | <b>0.947</b> | <b>1.462</b> | <b>0.833</b> | <b>0.656</b> | <b>1.057</b> |
| Gender, male                                   |                                                                       |              |              | 1.208               | 0.992        | 1.472        | 1.288        | 1.054        | 1.575        |
| Predicted risk of death 90-99%                 |                                                                       |              |              | 9.155               | 5.056        | 16.578       | 6.342        | 3.405        | 11.814       |
| Predicted risk of death 80-89%                 |                                                                       |              |              | 5.077               | 2.765        | 9.319        | 3.740        | 2.015        | 6.943        |
| Predicted risk of death 70-79%                 |                                                                       |              |              | 3.827               | 2.086        | 7.022        | 2.775        | 1.495        | 5.151        |
| Predicted risk of death 60-69%                 |                                                                       |              |              | 3.856               | 2.153        | 6.908        | 3.313        | 1.840        | 5.965        |
| Predicted risk of death 50-59%                 |                                                                       |              |              | 2.237               | 1.181        | 4.240        | 2.008        | 1.058        | 3.813        |
| Predicted risk of death 40-49%                 |                                                                       |              |              | 2.193               | 1.223        | 3.931        | 1.977        | 1.101        | 3.550        |
| Predicted risk of death 30-39%                 |                                                                       |              |              | 1.865               | 1.031        | 3.375        | 1.744        | 0.963        | 3.158        |
| Predicted risk of death 20-29%                 |                                                                       |              |              | 1.921               | 1.073        | 3.440        | 1.742        | 0.972        | 3.123        |
| Predicted risk of death 10-19%                 |                                                                       |              |              | 2.185               | 1.230        | 3.881        | 2.085        | 1.173        | 3.706        |
| Chronic kidney disease                         |                                                                       |              |              | 2.027               | 1.632        | 2.517        | 3.006        | 2.374        | 3.805        |
| Severe sepsis on admission                     |                                                                       |              |              | 2.022               | 1.546        | 2.645        | 1.292        | 0.964        | 1.732        |
| Vasopressor equivalent >0.6 mg/h               |                                                                       |              |              |                     |              |              | 1.027        | 1.019        | 1.036        |
| SOFA score AUC                                 |                                                                       |              |              |                     |              |              | 1.032        | 1.020        | 1.044        |
| Cumulative red blood cell products (per litre) |                                                                       |              |              |                     |              |              | 1.040        | 1.012        | 1.069        |
| Cumulative other blood products (per litre)    |                                                                       |              |              |                     |              |              | 0.971        | 0.948        | 0.994        |
| Cumulative fluid balance (per litre)           |                                                                       |              |              |                     |              |              | 1.021        | 0.971        | 1.073        |
| Daily crystalloid infusion (per litre)         |                                                                       |              |              |                     |              |              | 1.100        | 1.033        | 1.171        |

Risk of mortality was estimated from severity scores as detailed in the methods section. Gender, risk of mortality categories, vasopressor requirement, chronic kidney disease and severe sepsis on admission were used as binary variables (yes/no), whereas the hazard ratios (HR) for fluid-based variables and sequential organ failure assessment (SOFA) score describe the excess risk per litre of fluid and per SOFA area under the curve (AUC), respectively. CI, confidence interval. \*To show the effect of the modelling, we showed the unadjusted OR for the population that was eligible for the multivariable analysis. Crude OR for all patients in the registry are shown in the text.

**Supplemental digital content 9: Missing data analysis in Cox regression analysis of 90-day mortality for crystalloids vs. colloids**

| Hazard ratio estimates                         | Regular analysis |        |       | all patients with unknown status die 1 day after discharge |        |       | 10% of all patients die after discharge (unknown status is extrapolated based on post-ICU mortality) |        |       | 28% of all patients die after discharge (unknown status is extrapolated based on mortality in the cohort without 90 d follow up) |        |       | All patients with unknown status survive 90 days |        |       |
|------------------------------------------------|------------------|--------|-------|------------------------------------------------------------|--------|-------|------------------------------------------------------------------------------------------------------|--------|-------|----------------------------------------------------------------------------------------------------------------------------------|--------|-------|--------------------------------------------------|--------|-------|
|                                                | HR               | 95% CI |       | HR                                                         | 95% CI |       | HR                                                                                                   | 95% CI |       | HR                                                                                                                               | 95% CI |       | HR                                               | 95% CI |       |
| Gender, male                                   | 0.798            | 0.679  | 0.936 | 0.803                                                      | 0.722  | 0.892 | 0.775                                                                                                | 0.667  | 0.901 | 0.803                                                                                                                            | 0.700  | 0.922 | 0.798                                            | 0.679  | 0.936 |
| Predicted risk of death 90-99%                 | 4.505            | 2.781  | 7.298 | 1.582                                                      | 1.161  | 2.156 | 3.528                                                                                                | 2.270  | 5.482 | 2.747                                                                                                                            | 1.877  | 4.019 | 4.505                                            | 2.781  | 7.298 |
| Predicted risk of death 80-89%                 | 2.630            | 1.637  | 4.226 | 1.118                                                      | 0.835  | 1.496 | 2.284                                                                                                | 1.492  | 3.497 | 1.563                                                                                                                            | 1.072  | 2.280 | 2.630                                            | 1.637  | 4.226 |
| Predicted risk of death 70-99%                 | 2.250            | 1.412  | 3.586 | 1.018                                                      | 0.773  | 1.340 | 1.822                                                                                                | 1.194  | 2.779 | 1.292                                                                                                                            | 0.893  | 1.869 | 2.250                                            | 1.412  | 3.586 |
| Predicted risk of death 60-69%                 | 2.184            | 1.403  | 3.401 | 1.082                                                      | 0.846  | 1.385 | 1.843                                                                                                | 1.239  | 2.740 | 1.451                                                                                                                            | 1.039  | 2.028 | 2.184                                            | 1.403  | 3.401 |
| Predicted risk of death 50-59%                 | 1.718            | 1.070  | 2.757 | 1.024                                                      | 0.790  | 1.327 | 1.672                                                                                                | 1.101  | 2.538 | 1.237                                                                                                                            | 0.864  | 1.772 | 1.718                                            | 1.070  | 2.757 |
| Predicted risk of death 40-49%                 | 1.732            | 1.128  | 2.660 | 0.973                                                      | 0.779  | 1.216 | 1.586                                                                                                | 1.086  | 2.316 | 1.217                                                                                                                            | 0.887  | 1.669 | 1.732                                            | 1.128  | 2.660 |
| Predicted risk of death 30-39%                 | 1.484            | 0.957  | 2.303 | 0.962                                                      | 0.770  | 1.204 | 1.258                                                                                                | 0.849  | 1.863 | 1.052                                                                                                                            | 0.760  | 1.457 | 1.484                                            | 0.957  | 2.303 |
| Predicted risk of death 20-29%                 | 1.611            | 1.045  | 2.482 | 1.018                                                      | 0.818  | 1.266 | 1.490                                                                                                | 1.018  | 2.181 | 1.192                                                                                                                            | 0.870  | 1.635 | 1.611                                            | 1.045  | 2.482 |
| Predicted risk of death 10-19%                 | 1.759            | 1.140  | 2.712 | 1.083                                                      | 0.872  | 1.345 | 1.484                                                                                                | 1.009  | 2.182 | 1.160                                                                                                                            | 0.842  | 1.598 | 1.759                                            | 1.140  | 2.712 |
| Chronic kidney disease                         | 1.960            | 1.645  | 2.336 | 1.356                                                      | 1.196  | 1.537 | 1.768                                                                                                | 1.496  | 2.089 | 1.755                                                                                                                            | 1.505  | 2.047 | 1.960                                            | 1.645  | 2.336 |
| Severe sepsis on admission                     | 1.284            | 1.025  | 1.608 | 1.250                                                      | 1.062  | 1.472 | 1.338                                                                                                | 1.080  | 1.658 | 1.335                                                                                                                            | 1.094  | 1.628 | 1.284                                            | 1.025  | 1.608 |
| Vasopressor equivalent >0.6 mg/h               | 1.019            | 1.002  | 1.035 | 1.004                                                      | 0.990  | 1.018 | 1.017                                                                                                | 1.001  | 1.033 | 1.013                                                                                                                            | 0.998  | 1.029 | 1.019                                            | 1.002  | 1.035 |
| SOFA score AUC                                 | 1.030            | 1.024  | 1.036 | 1.011                                                      | 1.007  | 1.015 | 1.026                                                                                                | 1.020  | 1.031 | 1.021                                                                                                                            | 1.015  | 1.026 | 1.030                                            | 1.024  | 1.036 |
| Cumulative red blood cell products (per litre) | 0.977            | 0.958  | 0.997 | 0.992                                                      | 0.977  | 1.006 | 0.979                                                                                                | 0.960  | 0.997 | 0.985                                                                                                                            | 0.968  | 1.003 | 0.977                                            | 0.958  | 0.997 |
| Cumulative other blood products (per litre)    | 1.002            | 0.968  | 1.037 | 1.014                                                      | 0.984  | 1.044 | 1.007                                                                                                | 0.974  | 1.042 | 1.005                                                                                                                            | 0.973  | 1.039 | 1.002                                            | 0.968  | 1.037 |
| Cumulative fluid balance (per litre)           | 1.014            | 1.008  | 1.020 | 1.005                                                      | 1.000  | 1.010 | 1.011                                                                                                | 1.004  | 1.017 | 1.008                                                                                                                            | 1.002  | 1.014 | 1.014                                            | 1.008  | 1.020 |
| Daily crystalloid infusion (per litre)         | 1.121            | 1.067  | 1.178 | 1.176                                                      | 1.140  | 1.213 | 1.173                                                                                                | 1.122  | 1.226 | 1.176                                                                                                                            | 1.131  | 1.223 | 1.121                                            | 1.067  | 1.178 |
| Daily colloid infusion (per litre)             | 1.003            | 0.980  | 1.027 | 1.000                                                      | 0.981  | 1.020 | 0.997                                                                                                | 0.974  | 1.020 | 0.994                                                                                                                            | 0.971  | 1.017 | 1.003                                            | 0.980  | 1.027 |

Risk of mortality was estimated from severity scores as detailed in the methods section. Gender, risk of mortality categories, vasopressor requirement, chronic kidney disease and severe sepsis on admission were used as binary variables (yes/no), whereas the hazard ratios for fluid-based variables and sequential organ failure assessment (SOFA) score describe the excess risk per litre of fluid and per SOFA area under the curve (AUC), respectively.



**Supplemental digital content 10: Effects of colloid infusion in logistic regression analysis of intensive care unit mortality.**

| Odds ratio estimates                           | Unadjusted<br>(only patients eligible for<br>multivariable analysis)* |              |              | Baseline adjustment |              |              | Full model   |              |              |
|------------------------------------------------|-----------------------------------------------------------------------|--------------|--------------|---------------------|--------------|--------------|--------------|--------------|--------------|
|                                                | OR                                                                    | 95% CI       |              | OR                  | 95% CI       |              | OR           | 95% CI       |              |
| <b>Colloid infusion</b>                        | <b>3.087</b>                                                          | <b>2.416</b> | <b>3.945</b> | <b>1.547</b>        | <b>1.258</b> | <b>1.903</b> | <b>0.959</b> | <b>0.919</b> | <b>1.001</b> |
| Gender, male                                   |                                                                       |              |              | 1.463               | 1.200        | 1.784        | 0.726        | 0.608        | 0.867        |
| Predicted risk of death 90-99%                 |                                                                       |              |              | 12.993              | 7.766        | 21.738       | 8.885        | 5.295        | 14.907       |
| Predicted risk of death 80-89%                 |                                                                       |              |              | 3.467               | 2.135        | 5.631        | 3.518        | 2.196        | 5.638        |
| Predicted risk of death 70-99%                 |                                                                       |              |              | 2.557               | 1.599        | 4.088        | 2.691        | 1.715        | 4.224        |
| Predicted risk of death 60-69%                 |                                                                       |              |              | 1.490               | 0.947        | 2.344        | 2.108        | 1.380        | 3.220        |
| Predicted risk of death 50-59%                 |                                                                       |              |              | 1.660               | 1.044        | 2.640        | 1.615        | 1.037        | 2.515        |
| Predicted risk of death 40-49%                 |                                                                       |              |              | 0.967               | 0.630        | 1.484        | 1.428        | 0.963        | 2.119        |
| Predicted risk of death 30-39%                 |                                                                       |              |              | 0.735               | 0.471        | 1.146        | 1.013        | 0.676        | 1.517        |
| Predicted risk of death 20-29%                 |                                                                       |              |              | 0.647               | 0.417        | 1.005        | 0.999        | 0.671        | 1.485        |
| Predicted risk of death 10-19%                 |                                                                       |              |              | 0.634               | 0.406        | 0.989        | 1.114        | 0.751        | 1.653        |
| Chronic kidney disease                         |                                                                       |              |              | 3.294               | 2.670        | 4.065        | 3.010        | 2.480        | 3.654        |
| Severe sepsis on admission                     |                                                                       |              |              | 17.298              | 14.008       | 21.361       | 4.917        | 3.960        | 6.104        |
| Vasopressor equivalent >0.6 mg/h               |                                                                       |              |              |                     |              |              | 1.130        | 1.090        | 1.171        |
| SOFA score AUC                                 |                                                                       |              |              |                     |              |              | 1.000        | 0.993        | 1.008        |
| Cumulative red blood cell products (per litre) |                                                                       |              |              |                     |              |              | 0.993        | 0.966        | 1.020        |
| Cumulative other blood products (per litre)    |                                                                       |              |              |                     |              |              | 0.986        | 0.914        | 1.065        |
| Cumulative fluid balance (per litre)           |                                                                       |              |              |                     |              |              | 1.051        | 1.037        | 1.066        |
| Daily crystalloid infusion (per litre)         |                                                                       |              |              |                     |              |              | 0.718        | 0.666        | 0.775        |

Risk of mortality was estimated from severity scores as detailed in the methods section. Gender, risk of mortality categories, vasopressor requirement, chronic kidney disease and severe sepsis on admission were used as binary variables (yes/no), whereas the odds ratios (OR) for fluid-based variables and sequential organ failure assessment (SOFA) score describe the excess risk per litre of fluid and per SOFA area under the curve (AUC), respectively. CI, confidence interval. \*To show the effect of the modelling, we showed the unadjusted OR for the population that was eligible for the multivariable analysis. Crude OR for all patients in the registry are shown in the text.

**Supplemental digital content 11: Effects of colloid infusion (HES 130/0.4) in logistic regression analysis of intensive care unit mortality.**

| Odds ratio estimates                           | Unadjusted<br>(only patients eligible for<br>multivariable analysis)* |              |              | Baseline adjustment |              |              | Full model   |              |              |
|------------------------------------------------|-----------------------------------------------------------------------|--------------|--------------|---------------------|--------------|--------------|--------------|--------------|--------------|
|                                                | OR                                                                    | 95% CI       |              | OR                  | 95% CI       |              | OR           | 95% CI       |              |
| <b>Colloid infusion</b>                        | <b>2.281</b>                                                          | <b>1.718</b> | <b>3.028</b> | <b>2.347</b>        | <b>1.786</b> | <b>3.083</b> | <b>0.700</b> | <b>0.637</b> | <b>0.769</b> |
| Gender, male                                   |                                                                       |              |              | 1.798               | 1.400        | 2.310        | 0.719        | 0.581        | 0.890        |
| Predicted risk of death 90-99%                 |                                                                       |              |              | 9.124               | 4.992        | 16.675       | 9.714        | 5.364        | 17.593       |
| Predicted risk of death 80-89%                 |                                                                       |              |              | 3.381               | 1.868        | 6.121        | 4.707        | 2.683        | 8.260        |
| Predicted risk of death 70-99%                 |                                                                       |              |              | 2.201               | 1.219        | 3.974        | 3.019        | 1.743        | 5.229        |
| Predicted risk of death 60-69%                 |                                                                       |              |              | 1.324               | 0.739        | 2.371        | 2.589        | 1.533        | 4.373        |
| Predicted risk of death 50-59%                 |                                                                       |              |              | 1.294               | 0.700        | 2.390        | 1.531        | 0.875        | 2.679        |
| Predicted risk of death 40-49%                 |                                                                       |              |              | 0.799               | 0.453        | 1.409        | 1.406        | 0.853        | 2.316        |
| Predicted risk of death 30-39%                 |                                                                       |              |              | 0.719               | 0.403        | 1.283        | 1.088        | 0.656        | 1.804        |
| Predicted risk of death 20-29%                 |                                                                       |              |              | 0.447               | 0.246        | 0.811        | 1.063        | 0.647        | 1.745        |
| Predicted risk of death 10-19%                 |                                                                       |              |              | 0.530               | 0.294        | 0.955        | 1.188        | 0.728        | 1.938        |
| Chronic kidney disease                         |                                                                       |              |              | 3.638               | 2.782        | 4.756        | 3.138        | 2.483        | 3.966        |
| Severe sepsis on admission                     |                                                                       |              |              | 30.259              | 23.052       | 39.720       | 5.999        | 4.596        | 7.829        |
| Vasopressor equivalent >0.6 mg/h               |                                                                       |              |              |                     |              |              | 1.114        | 1.052        | 1.179        |
| SOFA score AUC                                 |                                                                       |              |              |                     |              |              | 0.994        | 0.984        | 1.003        |
| Cumulative red blood cell products (per litre) |                                                                       |              |              |                     |              |              | 1.008        | 0.967        | 1.051        |
| Cumulative other blood products (per litre)    |                                                                       |              |              |                     |              |              | 1.076        | 0.938        | 1.233        |
| Cumulative fluid balance (per litre)           |                                                                       |              |              |                     |              |              | 1.058        | 1.037        | 1.078        |
| Daily crystalloid infusion (per litre)         |                                                                       |              |              |                     |              |              | 0.961        | 0.896        | 1.032        |

Risk of mortality was estimated from severity scores as detailed in the methods section. Gender, risk of mortality categories, vasopressor requirement, chronic kidney disease and severe sepsis on admission were used as binary variables (yes/no), whereas the odds ratios (OR) for fluid-based variables and sequential organ failure assessment (SOFA) score describe the excess risk per liter of fluid and per SOFA area under the curve (AUC), respectively. CI, confidence interval. \*To show the effect of the modelling, we showed the unadjusted OR for the population that was eligible for the multivariable analysis. Crude OR for all patients in the registry are shown in the text.

**Supplemental digital content 12: Effects of colloid infusion (HES 130/0.4) in logistic regression analysis of RIFLE “failure”.**

| Odds ratio estimates                           | Unadjusted<br>(only patients eligible for<br>multivariable analysis)* |              |              | Baseline adjustment |              |              | Full model   |              |              |
|------------------------------------------------|-----------------------------------------------------------------------|--------------|--------------|---------------------|--------------|--------------|--------------|--------------|--------------|
|                                                | OR                                                                    | 95% CI       |              | OR                  | 95% CI       |              | OR           | 95% CI       |              |
| <b>Colloid infusion</b>                        | <b>1.931</b>                                                          | <b>1.541</b> | <b>2.419</b> | <b>2.260</b>        | <b>1.730</b> | <b>2.953</b> | <b>0.800</b> | <b>0.704</b> | <b>0.910</b> |
| Gender, male                                   |                                                                       |              |              | 1.248               | 0.977        | 1.594        | 0.975        | 0.707        | 1.343        |
| Predicted risk of death 90-99%                 |                                                                       |              |              | 23.968              | 11.937       | 48.123       | 3.797        | 0.501        | 28.792       |
| Predicted risk of death 80-89%                 |                                                                       |              |              | 6.825               | 3.426        | 13.596       | 3.839        | 0.505        | 29.163       |
| Predicted risk of death 70-99%                 |                                                                       |              |              | 5.622               | 2.882        | 10.969       | 2.882        | 0.377        | 22.010       |
| Predicted risk of death 60-69%                 |                                                                       |              |              | 3.575               | 1.869        | 6.839        | 5.173        | 0.693        | 38.624       |
| Predicted risk of death 50-59%                 |                                                                       |              |              | 3.211               | 1.634        | 6.312        | 3.965        | 0.515        | 30.554       |
| Predicted risk of death 40-49%                 |                                                                       |              |              | 1.729               | 0.914        | 3.271        | 2.460        | 0.321        | 18.886       |
| Predicted risk of death 30-39%                 |                                                                       |              |              | 1.808               | 0.951        | 3.438        | 2.348        | 0.300        | 18.357       |
| Predicted risk of death 20-29%                 |                                                                       |              |              | 0.947               | 0.490        | 1.830        | 2.067        | 0.257        | 16.652       |
| Predicted risk of death 10-19%                 |                                                                       |              |              | 1.261               | 0.660        | 2.407        | 1.965        | 0.204        | 18.972       |
| Chronic kidney disease                         |                                                                       |              |              | 13.279              | 10.221       | 17.251       | 2.577        | 1.861        | 3.569        |
| Severe sepsis on admission                     |                                                                       |              |              | 10.813              | 8.412        | 13.900       | 0.791        | 0.475        | 1.318        |
| Vasopressor equivalent >0.6 mg/h               |                                                                       |              |              |                     |              |              | 0.860        | 0.763        | 0.969        |
| SOFA score AUC                                 |                                                                       |              |              |                     |              |              | 1.070        | 1.060        | 1.080        |
| Cumulative red blood cell products (per litre) |                                                                       |              |              |                     |              |              | 0.805        | 0.620        | 1.046        |
| Cumulative other blood products (per litre)    |                                                                       |              |              |                     |              |              | 1.015        | 0.956        | 1.079        |
| Cumulative fluid balance (per litre)           |                                                                       |              |              |                     |              |              | 0.995        | 0.963        | 1.027        |
| Daily crystalloid infusion (per litre)         |                                                                       |              |              |                     |              |              | 1.225        | 1.115        | 1.347        |

Risk of mortality was estimated from severity scores as detailed in the methods section. Gender, risk of mortality categories, vasopressor requirement, chronic kidney disease and severe sepsis on admission were used as binary variables (yes/no), whereas the odds ratios (OR) for fluid-based variables and sequential organ failure assessment (SOFA) score describe the excess risk per liter of fluid and per SOFA area under the curve (AUC), respectively. CI, confidence interval. \*To show the effect of the modelling, we showed the unadjusted OR for the population that was eligible for the multivariable analysis. Crude OR for all patients in the registry are shown in the text.

## Supplemental digital content 13: Urine output and creatinine concentrations

Supplemental digital content 13A: Median creatinine (blue line) and quartiles (dashed lines).

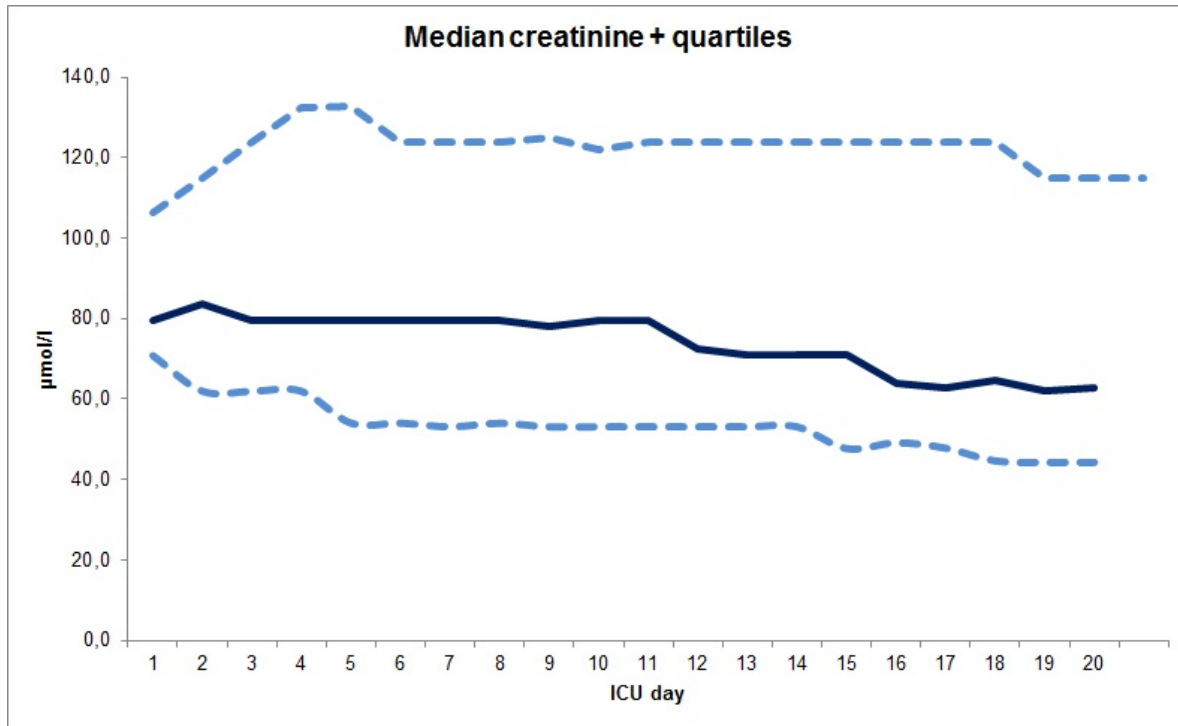

Supplemental digital content 13B: Urine output. Median (blue line) and 25th and 75th percentile (dashed lines).

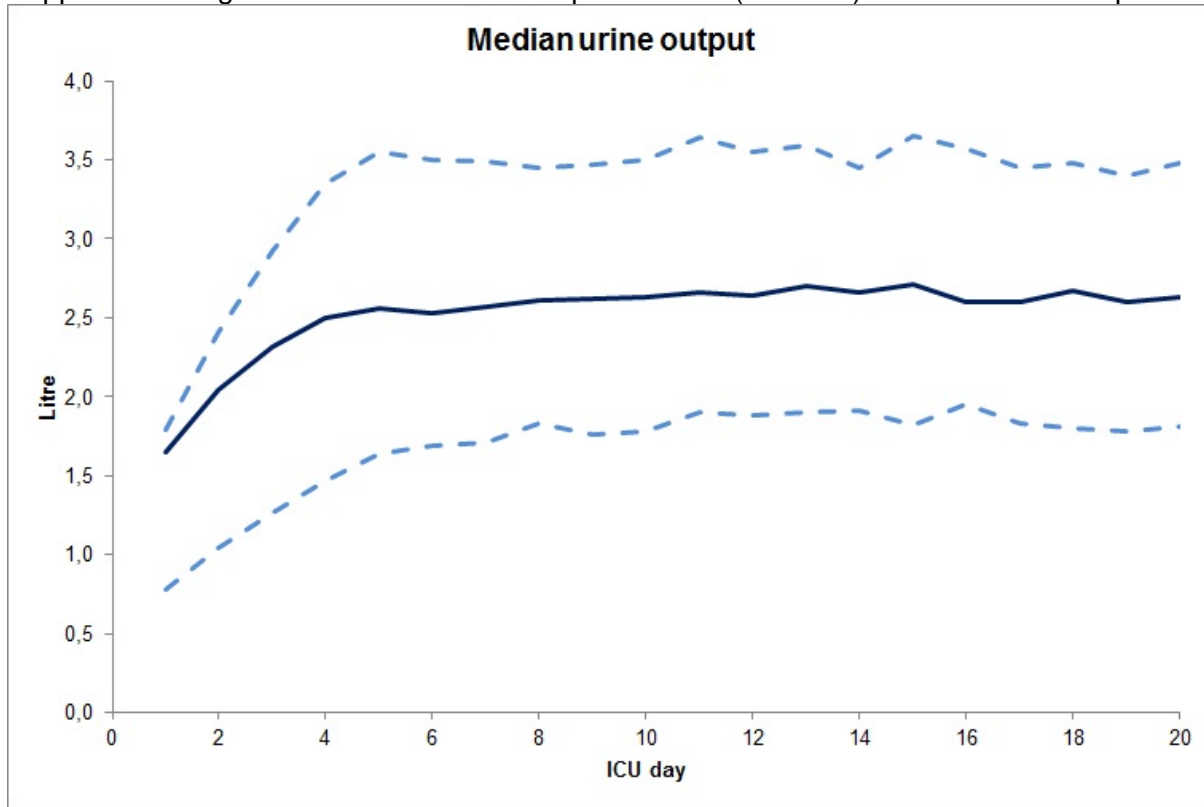

## Supplemental digital content 14: Acute kidney injury in study patients with or without pre-existing chronic kidney disease (CKD) on admission.

Data are given as n (%).

|                  | All          | RIFLE „failure“ |             | Renal replacement therapy |             |
|------------------|--------------|-----------------|-------------|---------------------------|-------------|
|                  |              | Yes             | No          | Yes                       | No          |
| CKD on admission |              |                 |             |                           |             |
| Yes              | 824 (100.0)  | 324 (39.3)      | 500 (60.7)  | 194 (23.5)                | 630 (76.5)  |
| No               | 3721 (100.0) | 236 (6.3)       | 3485 (93.7) | 167 (4.5)                 | 3554 (95.5) |

## Supplemental digital content 15: Effects of colloid infusion in logistic regression analysis of renal replacement therapy.

Supplemental digital content 15A: Effects of colloid infusion in logistic regression analysis of renal replacement therapy.

| Odds ratio estimates                           | Unadjusted<br>(only patients eligible for<br>multivariable analysis)* |              |              | Baseline adjustment |              |              | Full model   |              |              |
|------------------------------------------------|-----------------------------------------------------------------------|--------------|--------------|---------------------|--------------|--------------|--------------|--------------|--------------|
|                                                | OR                                                                    | 95% CI       |              | OR                  | 95% CI       |              | OR           | 95% CI       |              |
| <b>Colloid infusion</b>                        | <b>3.882</b>                                                          | <b>2.988</b> | <b>5.043</b> | <b>1.953</b>        | <b>1.569</b> | <b>2.431</b> | <b>0.877</b> | <b>0.790</b> | <b>0.973</b> |
| Gender, male                                   |                                                                       |              |              | 1.082               | 0.878        | 1.334        | 0.985        | 0.786        | 1.234        |
| Predicted risk of death 90-99%                 |                                                                       |              |              | 17.761              | 10.359       | 30.451       | 12.614       | 6.804        | 23.387       |
| Predicted risk of death 80-89%                 |                                                                       |              |              | 2.896               | 1.728        | 4.853        | 2.928        | 1.636        | 5.239        |
| Predicted risk of death 70-99%                 |                                                                       |              |              | 2.414               | 1.473        | 3.957        | 2.260        | 1.298        | 3.935        |
| Predicted risk of death 60-69%                 |                                                                       |              |              | 1.414               | 0.880        | 2.271        | 1.388        | 0.818        | 2.355        |
| Predicted risk of death 50-59%                 |                                                                       |              |              | 1.373               | 0.839        | 2.248        | 1.444        | 0.842        | 2.476        |
| Predicted risk of death 40-49%                 |                                                                       |              |              | 0.951               | 0.608        | 1.490        | 1.105        | 0.675        | 1.807        |
| Predicted risk of death 30-39%                 |                                                                       |              |              | 0.597               | 0.370        | 0.961        | 0.712        | 0.426        | 1.188        |
| Predicted risk of death 20-29%                 |                                                                       |              |              | 0.573               | 0.360        | 0.913        | 0.626        | 0.377        | 1.040        |
| Predicted risk of death 10-19%                 |                                                                       |              |              | 0.698               | 0.441        | 1.107        | 0.816        | 0.494        | 1.346        |
| Chronic kidney disease                         |                                                                       |              |              | 7.685               | 6.198        | 9.528        | 6.135        | 4.889        | 7.698        |
| Severe sepsis on admission                     |                                                                       |              |              | 14.653              | 11.817       | 18.169       | 14.881       | 11.542       | 19.186       |
| Vasopressor equivalent >0.6 mg/h               |                                                                       |              |              |                     |              |              | 0.779        | 0.731        | 0.830        |
| SOFA score AUC                                 |                                                                       |              |              |                     |              |              | 1.048        | 1.040        | 1.056        |
| Cumulative red blood cell products (per litre) |                                                                       |              |              |                     |              |              | 0.997        | 0.951        | 1.046        |
| Cumulative other blood products (per litre)    |                                                                       |              |              |                     |              |              | 1.145        | 0.933        | 1.405        |
| Cumulative fluid balance (per litre)           |                                                                       |              |              |                     |              |              | 1.037        | 1.017        | 1.057        |
| Daily crystalloid infusion (per litre)         |                                                                       |              |              |                     |              |              | 0.682        | 0.626        | 0.742        |

Risk of mortality was estimated from severity scores as detailed in the methods section. Gender, risk of mortality categories, vasopressor requirement, chronic kidney disease and severe sepsis on admission were used as binary variables (yes/no), whereas the odds ratios (OR) for fluid-based variables and sequential organ failure assessment (SOFA) score describe the excess risk per liter of fluid and per SOFA area under the curve (AUC), respectively. CI, confidence interval. \*To show the effect of the modelling, we showed the unadjusted OR for the population that was eligible for the multivariable analysis. Crude OR for all patients in the registry are shown in the text.

Supplemental digital content 15B: Effects of HES130/0.4 infusion in logistic regression analysis of renal replacement therapy.

| Odds ratio estimates                           | Unadjusted<br>(only patients eligible for<br>multivariable analysis)* |              |              | Baseline adjustment |              |              | Full model   |              |              |
|------------------------------------------------|-----------------------------------------------------------------------|--------------|--------------|---------------------|--------------|--------------|--------------|--------------|--------------|
|                                                | OR                                                                    | 95% CI       |              | OR                  | 95% CI       |              | OR           | 95% CI       |              |
| <b>Colloid infusion</b>                        | <b>3.187</b>                                                          | <b>2.379</b> | <b>4.269</b> | <b>3.465</b>        | <b>2.591</b> | <b>4.632</b> | <b>0.509</b> | <b>0.441</b> | <b>0.586</b> |
| Gender, male                                   |                                                                       |              |              | 1.494               | 1.151        | 1.939        | 0.708        | 0.528        | 0.949        |
| Predicted risk of death 90-99%                 |                                                                       |              |              | 12.384              | 6.554        | 23.401       | 16.016       | 7.282        | 35.226       |
| Predicted risk of death 80-89%                 |                                                                       |              |              | 3.039               | 1.617        | 5.711        | 5.238        | 2.431        | 11.284       |
| Predicted risk of death 70-99%                 |                                                                       |              |              | 2.445               | 1.325        | 4.513        | 3.286        | 1.559        | 6.928        |
| Predicted risk of death 60-69%                 |                                                                       |              |              | 1.193               | 0.648        | 2.197        | 1.700        | 0.825        | 3.501        |
| Predicted risk of death 50-59%                 |                                                                       |              |              | 1.278               | 0.675        | 2.419        | 1.700        | 0.804        | 3.596        |
| Predicted risk of death 40-49%                 |                                                                       |              |              | 0.717               | 0.395        | 1.304        | 1.193        | 0.593        | 2.400        |
| Predicted risk of death 30-39%                 |                                                                       |              |              | 0.557               | 0.297        | 1.045        | 0.882        | 0.429        | 1.812        |
| Predicted risk of death 20-29%                 |                                                                       |              |              | 0.415               | 0.221        | 0.780        | 0.610        | 0.294        | 1.264        |
| Predicted risk of death 10-19%                 |                                                                       |              |              | 0.581               | 0.315        | 1.073        | 0.904        | 0.445        | 1.839        |
| Chronic kidney disease                         |                                                                       |              |              | 9.588               | 7.250        | 12.680       | 6.987        | 5.173        | 9.438        |
| Severe sepsis on admission                     |                                                                       |              |              | 21.657              | 16.497       | 28.431       | 22.874       | 16.149       | 32.398       |
| Vasopressor equivalent >0.6 mg/h               |                                                                       |              |              |                     |              |              | 0.633        | 0.568        | 0.705        |
| SOFA score AUC                                 |                                                                       |              |              |                     |              |              | 1.064        | 1.052        | 1.076        |
| Cumulative red blood cell products (per litre) |                                                                       |              |              |                     |              |              | 0.987        | 0.905        | 1.077        |
| Cumulative other blood products (per litre)    |                                                                       |              |              |                     |              |              | 0.927        | 0.684        | 1.257        |
| Cumulative fluid balance (per litre)           |                                                                       |              |              |                     |              |              | 1.030        | 0.995        | 1.066        |
| Daily crystalloid infusion (per litre)         |                                                                       |              |              |                     |              |              | 1.084        | 0.934        | 1.257        |

Risk of mortality was estimated from severity scores as detailed in the methods section. Gender, risk of mortality categories, vasopressor requirement, chronic kidney disease and severe sepsis on admission were used as binary variables (yes/no), whereas the odds ratios (OR) for fluid-based variables and sequential organ failure assessment (SOFA) score describe the excess risk per liter of fluid and per SOFA area under the curve (AUC), respectively. CI, confidence interval. \*To show the effect of the modelling, we showed the unadjusted OR for the population that was eligible for the multivariable analysis. Crude OR for all patients in the registry are shown in the text.
